# Supplementary material
Source: Springer Nature journal article supplement (https://www.springermedizin.de/resource/supplementary/12885_2007_965_MOESM1_ESM.pdf/9471414)

# TP53(-) age>53

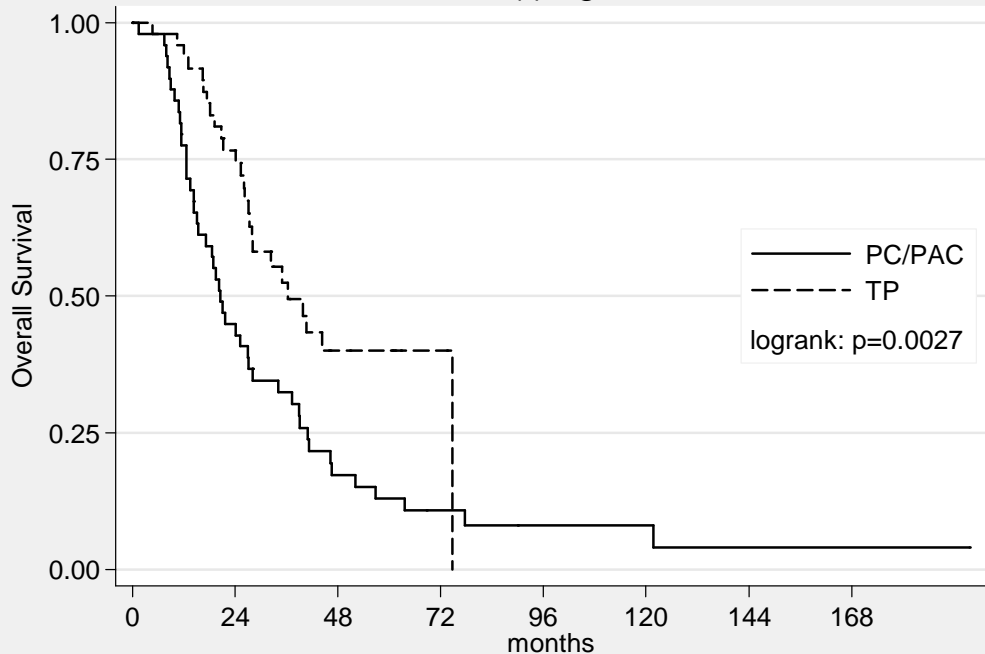

## Number of patients at risk

|               |           |           |           |          |          |
|---------------|-----------|-----------|-----------|----------|----------|
| <b>PC/PAC</b> | <b>49</b> | <b>22</b> | <b>8</b>  | <b>4</b> | <b>2</b> |
| <b>TP</b>     | <b>48</b> | <b>36</b> | <b>10</b> | <b>2</b> | <b>-</b> |

Supplement: MOESM1 [file 9471414]
